# Supplementary material for: Cortical dendritic activity correlates with spindle-rich oscillations during sleep in rodents
Source: PubMed Central journal article supplement (PMC5612962; doi:10.1038/s41467-017-00735-w), 2017-09-25
Supplement: 41467_2017_735_MOESM1_ESM.pdf [file 41467_2017_735_MOESM1_ESM.pdf]

**File name:** Supplementary Information

**Description:** Supplementary Figures and Supplementary Table

**File name:** Peer Review File

## SUPPLEMENTARY FIGURES

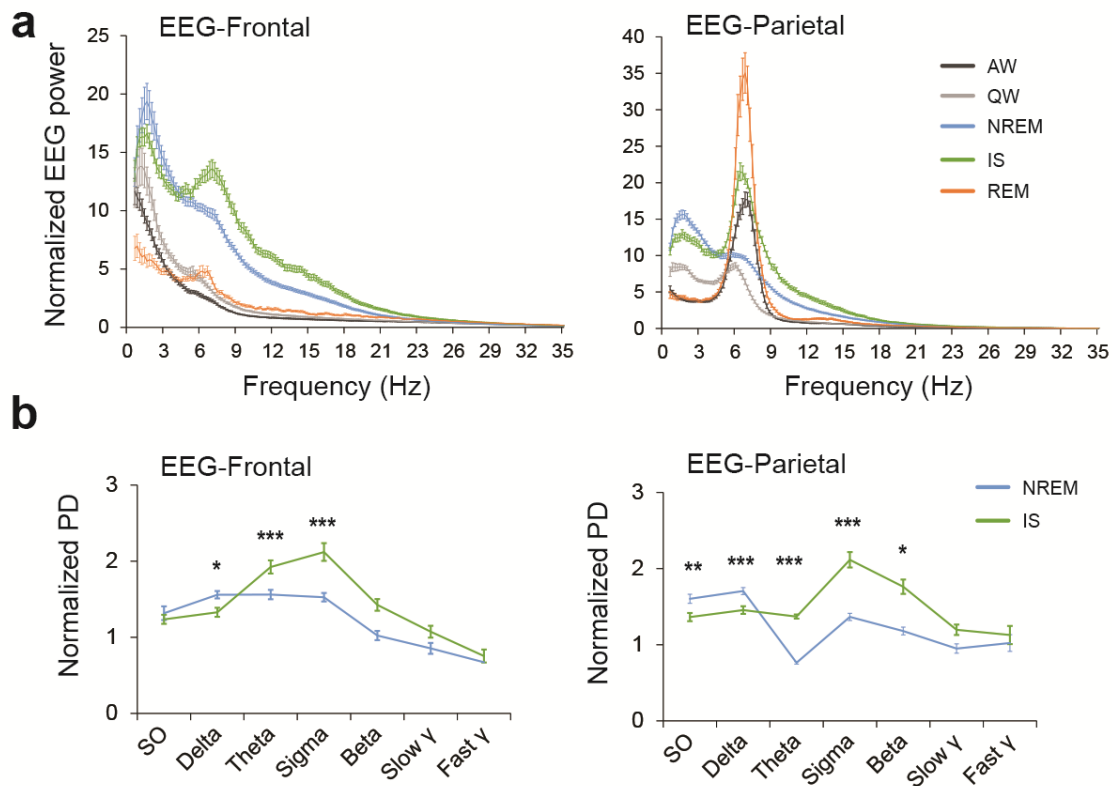

**Supplementary Fig. 1 EEG changes across behavioural states (a)** Average EEG power spectra for frontal and parietal EEGs for all five behavioural states. **(b)** Comparison of PD for several frequency bands between NREM and IS sleep ( $***P < 0.001$ ,  $**P < 0.01$ ,  $*P < 0.05$ , t-test). Data from all groups were pooled due to similar trend (two-way ANOVA; factor “group”:  $P > 0.8$  for all frequency bands in frontal and parietal EEGs across behavioural states,  $n = 28$ ). All values represent means  $\pm$  s.e.m.

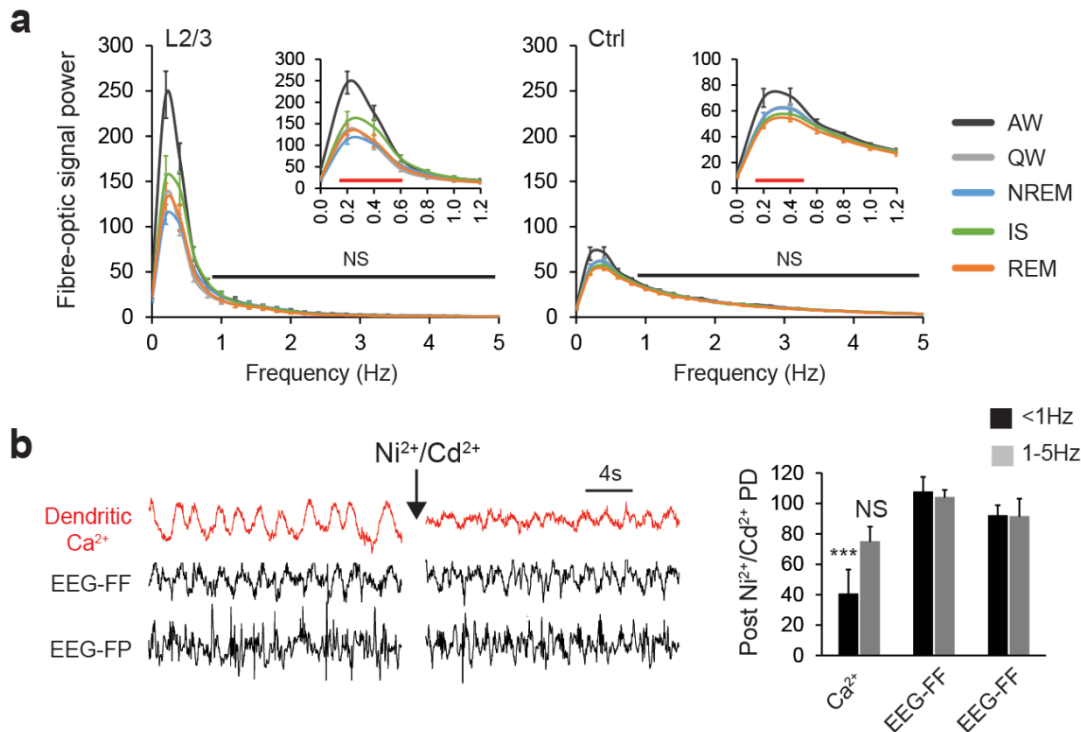

**Supplementary Fig. 2 Validation of the 0.1-1Hz PD frequency band for fibre-optic  $\text{Ca}^{2+}$  activity measurements** (a) Average power spectra of the fibre-optic signal (normalized to the mean across behavioural states) recorded in L2/3 ( $n = 11$ ) and Ctrl ( $n = 6$ ) groups. Significant differences between states were only found for frequencies  $< 1\text{Hz}$  (two-way ANOVA; factor “state”; L2/3:  $F_{4,1248} = 16.85$ , Ctrl:  $F_{4,650} = 11.85$ ;  $P < 0.001$  for both groups; red line (*inset graph*):  $P < 0.05$ , black line (*main graph*):  $P > 0.05$ , Holm-Sidak test). (b) Blocking  $\text{Ca}^{2+}$  currents in dendrites with  $\text{Ni}^{2+}(2\mu\text{M})/\text{Cd}^{2+}$  ( $1\mu\text{M}$ ) in anaesthetized animals ( $n = 8$ ) significantly decreased ( $\sim 60\%$ ) the  $\text{Ca}^{2+}$  signal recorded for oscillations  $< 1\text{Hz}$  but not  $> 1\text{Hz}$  (baseline vs. post-drug application:  $<1\text{Hz}$ ,  $t = 7.29$ ,  $P < 0.001$ ;  $1-5\text{Hz}$ ,  $t = 1.24$ ,  $P = 0.24$ , t-test). Drug application did not affect EEGs in either frequency band (baseline vs. post-drug application: FF ( $<1\text{Hz}$ ),  $t = 0.48$ ,  $P = 0.88$ ; FF ( $1-5\text{Hz}$ ),  $t = 0.09$ ,  $P = 0.93$ ; FP ( $<1\text{Hz}$ ),  $t = 0.75$ ,  $P = 0.47$ ; FP ( $1-5\text{Hz}$ ),  $t = 0.72$ ,  $P = 0.48$ , t-test). All values represent means  $\pm$  s.e.m.

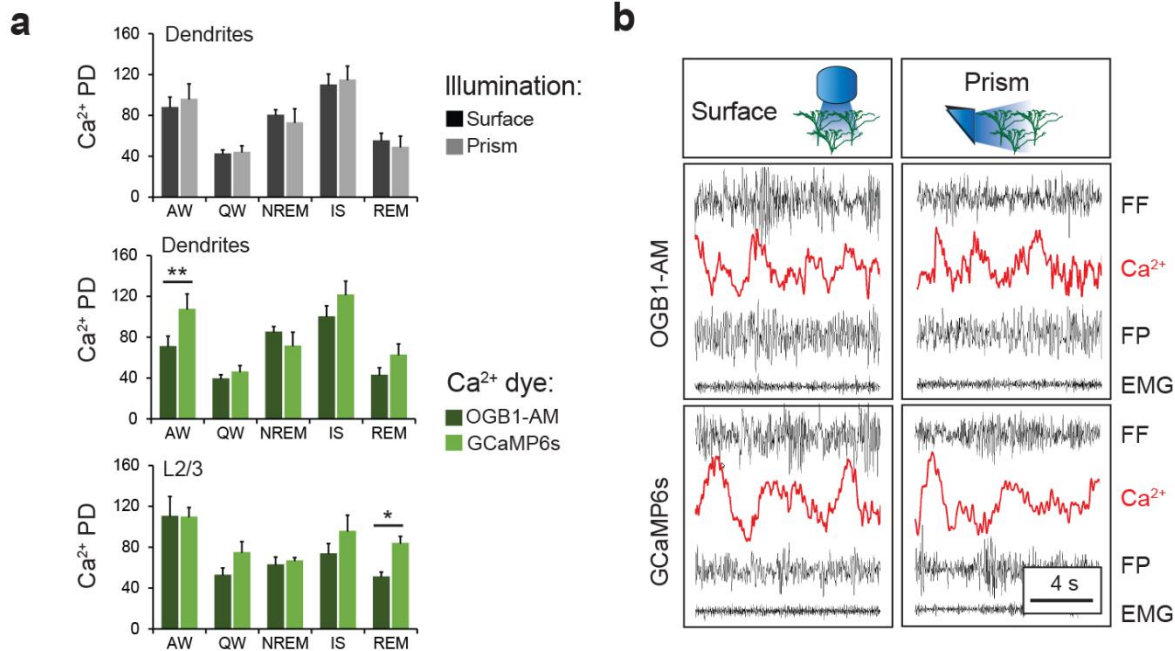

**Supplementary Fig. 3** Ca<sup>2+</sup> changes across brain states are independent of Ca<sup>2+</sup> dye or illumination angle (a) Changes in the dendritic Ca<sup>2+</sup> PD do not depend on the illumination angle (three-way ANOVA; factor “illumination”:  $F_{4,44} = 0.001$ ,  $P = 0.98$ ; upper graph). There was, however, a significant trend towards higher values for recordings with GCaMP6s compared to OGB1-AM in both groups (factor “dye”: L2/3,  $F_{4,44} = 6.12$ ,  $P = 0.02$  two-way ANOVA; Dendrites,  $F_{4,44} = 8.55$ ,  $P = 0.005$  three-way ANOVA;  $**P < 0.001$ ,  $*P < 0.05$ , Holm-Sidak test, lower two graphs). These differences were significant during AW in dendrites and REM sleep in L2/3. The main results reported in Figure 2c are therefore not affected by this effect. Values represent means  $\pm$  s.e.m. Number of animals for each group are reported in Supplementary Table 1. (b) Examples of dendritic Ca<sup>2+</sup> signals recorded during IS with different combinations of dye and illumination angle. EEGs (FF & FP) and EMG signals are represented.

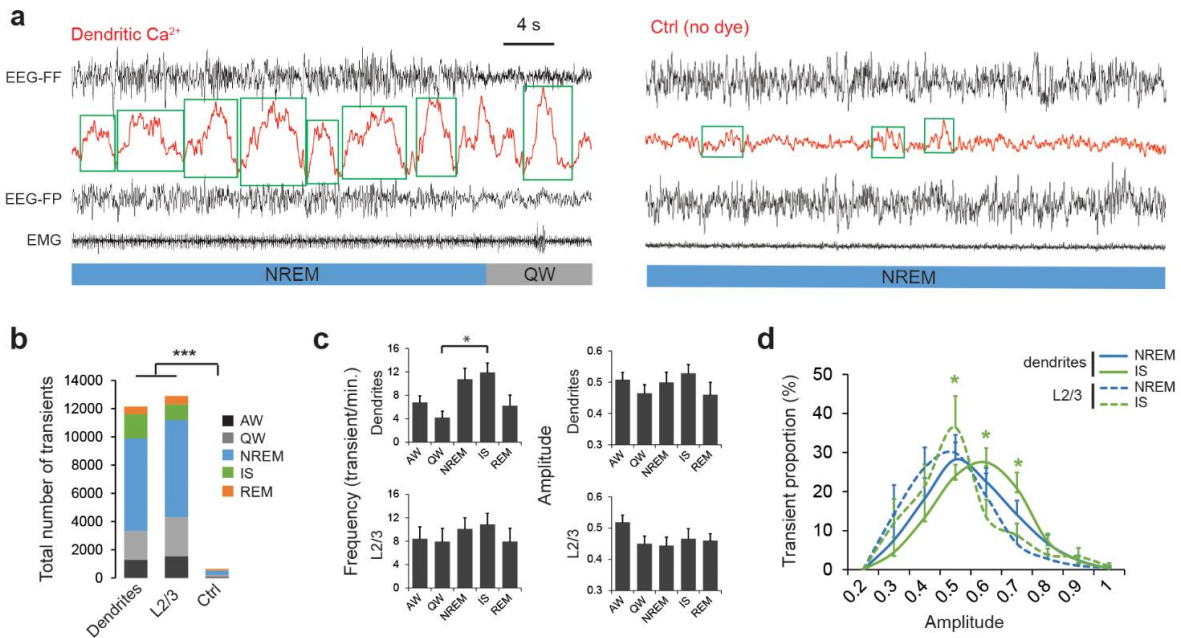

**Supplementary Fig. 4 Ca<sup>2+</sup> transient analysis** (a) Segments of combined Ca<sup>2+</sup>/EEG recordings showing examples of detected transients from population of dendrites (*left*) and from a rat that did not express any Ca<sup>2+</sup> indicator (Ctrl, *right*). EEG/EMG are in black, optical recordings are in red and behavioral states are represent at the bottom of each recording segment. (b) Cumulative number of transients across behavioral states in each group (two-way ANOVA; factor “group”:  $F_{2,125} = 10.27$ ,  $P < 0.001$ ; vs. Ctrl, \*\*\*  $P < 0.001$ , Dendrites vs. L2/3,  $P = 0.75$ , Holm-Sidak test). The number of transients detected in each behavioural states were comparable between dendritic and L2/3 recordings ( $P > 0.5$  for all states, Holm-Sidak test). (c) Ca<sup>2+</sup> transient frequency (*left graphs*) and amplitude (*right graphs*) for dendritic and L2/3 recordings (Frequency (dendrites):  $H = 13.64$ ,  $P = 0.009$  Kruskal-Wallis one-way ANOVA on Ranks; \* $P < 0.05$ , Dunn’s test). (d) Mean percentage of transients of a given amplitude (represented in 0.1 bins) in NREM and IS (expressed as percentage of all transients/animal) for dendritic and L2/3 recordings (group X interval during IS:  $F_{8,180} = 2.68$ ,  $P = 0.008$  one-way ANOVA; \* $P < 0.05$ , Dunn’s test). For (c) and (d) values represent means  $\pm$  s.e.m.  $N = 11$  for dendrites and L2/3 groups and  $n = 6$  for the Ctrl group.

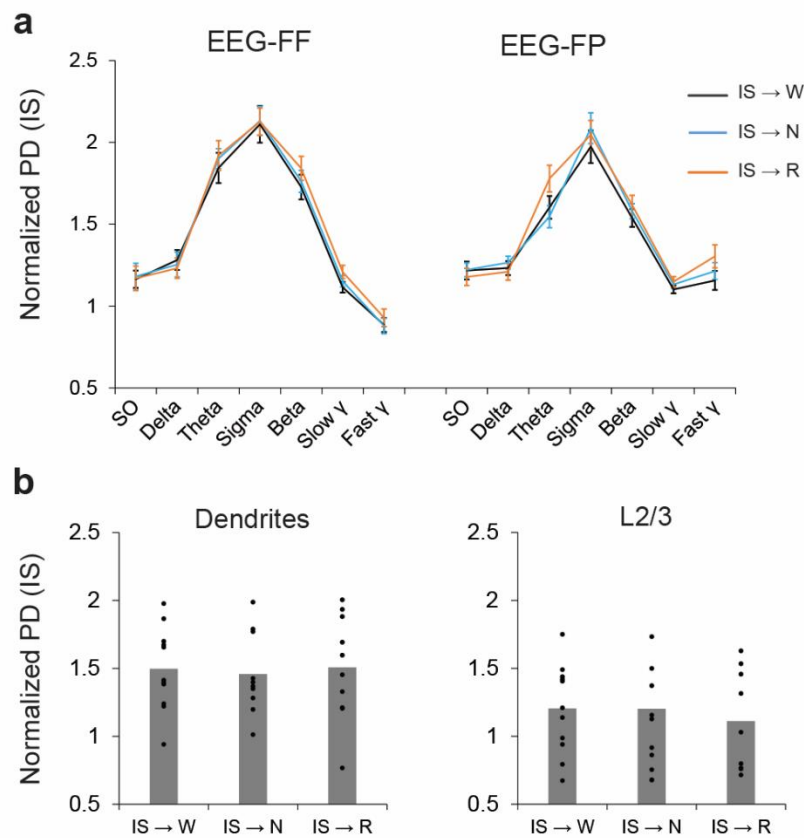

**Supplementary Fig. 5 EEG and Ca<sup>2+</sup> activity at IS transitions** (a) IS oscillatory signature (i.e. PD frequency distribution in frontal and parietal EEGs) were similar at IS-WAKE (W: AW/QW), IS-NREM (N), and IS-REM (R) transitions (two-way ANOVA; factor “transition”; EEG-FF:  $F_{2,406} = 1.04$ ,  $P = 0.35$ ; EEG-FP:  $F_{2,406} = 2.07$ ,  $P = 0.13$ ). Values for both groups (dendrites & L2/3) were pooled ( $n = 22$ ) and represent means  $\pm$  s.e.m. (b) Mean (grey bars) Ca<sup>2+</sup> activity in dendrites ( $n = 11$ ) and L2/3 neurons ( $n = 11$ ) did not vary depending on IS transitions (Dendrites:  $F_{2,28} = 0.06$ ,  $P = 0.94$  one-way ANOVA; L2/3:  $H = 0.63$ ,  $P = 0.73$  Kruskal-Wallis one-way ANOVA on Ranks). Black dots = individual animals. For (a) and (b), a single value (average EEG PD or Ca<sup>2+</sup> PD) for each type of transition was calculated for each animal.

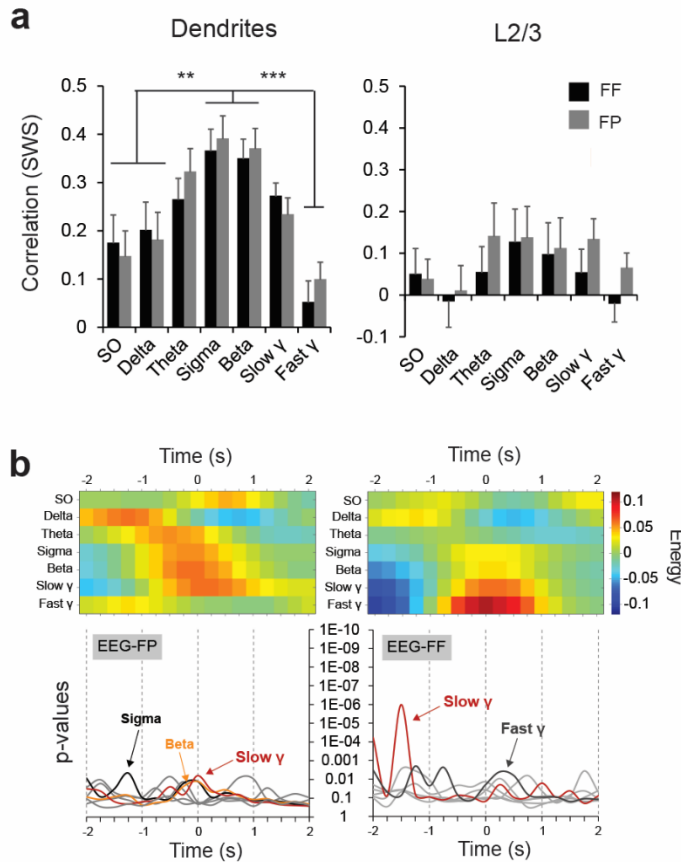

**Supplementary Fig. 6 Relationship between  $\text{Ca}^{2+}$  activity in population of dendrites and L2/3 neurons and EEG during SWS** (a) Mean ( $\pm$  s.e.m.) correlation (Pearson) coefficient across animals between  $\text{Ca}^{2+}$  and EEG PDs for all frequency bands for dendrites (*left graph*) and L2/3 (*right graph*). Values from individual 4-s epochs were used for correlations (mean number of SWS epochs: dendrites =  $991.18 \pm 83.16$ , L2/3 =  $1029.1 \pm 94.15$ ,  $n = 11/\text{group}$ ). Two-way ANOVAs showed no significant effect of EEG (Dendrites:  $F_{1,140} = 1.15$ ,  $P = 0.7$ ; L2/3:  $F_{1,140} = 1.57$ ,  $P = 0.21$ ) but a significant effect of frequency bands only for dendritic recordings (Dendrites:  $F_{6,140} = 11.69$ ,  $P < 0.001$ , L2/3:  $F_{6,140} = 1.27$ ,  $P = 0.27$  ; \*\*\*  $P < 0.01$ , \*\*  $P < 0.01$ , Holm-Sidak test). (b) Time-frequency analysis for L2/3 recordings. Results for EEG-FP (left) and EEG-FF (right) are represented. Energy heat maps (*upper graphs*) with corresponding  $p$ -values (*bottom graphs*) for a  $\pm 2$ -s cross-correlation time window (see Methods).

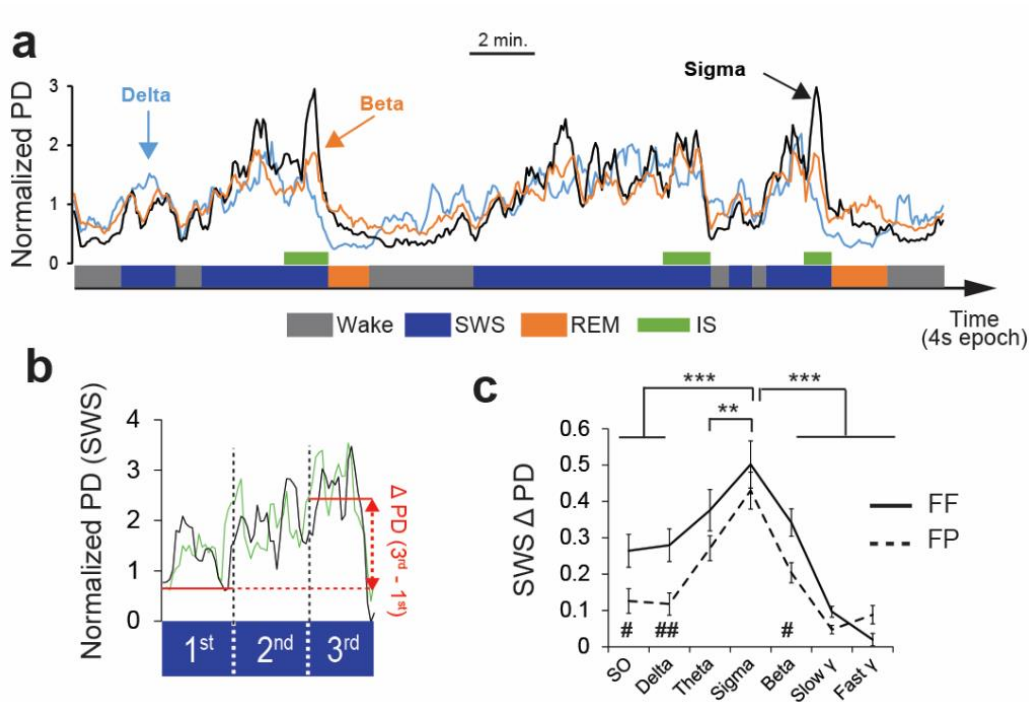

**Supplementary Fig. 7 Network oscillatory dynamics during SWS (a)** Example of EEG power (PD) fluctuations for delta, sigma and beta bands across behavioural states. Data are represented as trendlines (Methods). **(b)** Illustration of the  $\Delta PD$  ( $PD\ 3^{rd} - PD\ 1^{st}$ ) calculation used for (c). **(c)** A three-way ANOVA showed no significant effect of group (Dendrites vs. L2/3:  $F_{1,280} = 1.51$ ,  $P = 0.22$ ) but a significant effect of both EEG ( $F_{1,280} = 16.41$ ,  $P < 0.001$ ) and frequency bands ( $F_{1,280} = 26.83$ ,  $P < 0.001$ ). Mean ( $\pm$  s.e.m.)  $\Delta PD$  during individual SWS episodes is largest in frontal areas and for sigma power compared to other frequency bands (FF vs. FP: ##  $P < 0.01$ , #  $P < 0.05$ ; vs. sigma: \*\*\*  $P < 0.001$ , \*\*  $P < 0.01$ ; Holm-Sidak test,  $n = 22$  [dendrites & L2/3]).



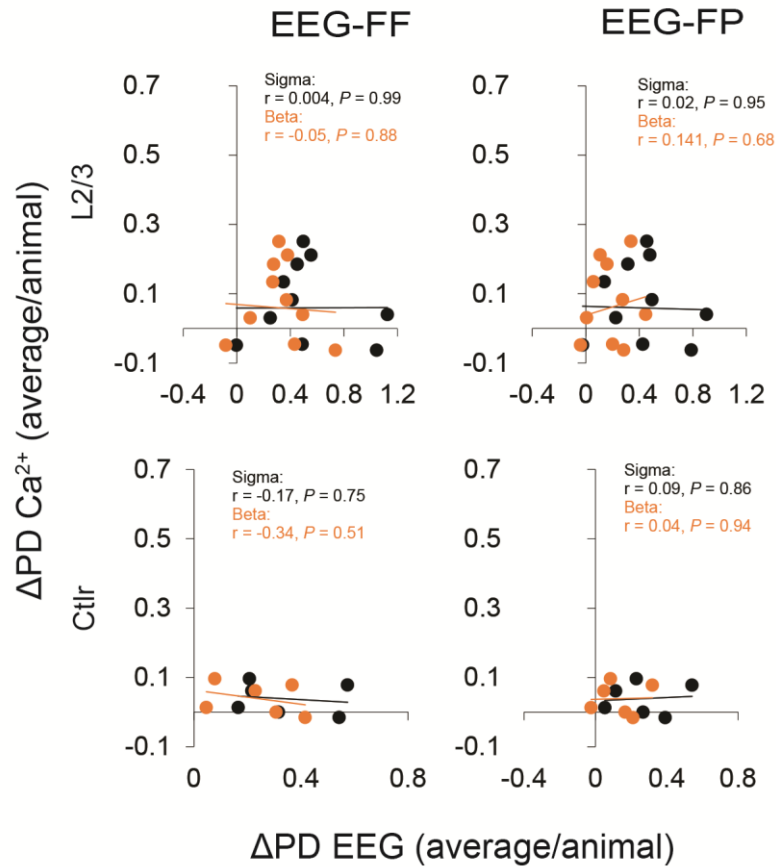

**Supplementary Fig. 8 Correlation between the magnitude ( $\Delta PD$ ) of  $Ca^{2+}$  and sigma-beta PDs changes during SWS episodes for L2/3 and Ctrl recordings** Scatter plots showing the correlation (Pearson) coefficient (and associated  $P$  values) between the average (across SWS episodes/animal)  $Ca^{2+}$  and sigma and beta PDs for frontal (FF) and parietal (FP) EEGs (values represent individual animals,  $n = 11$  for L2/3 and  $n = 6$  for Ctrl).

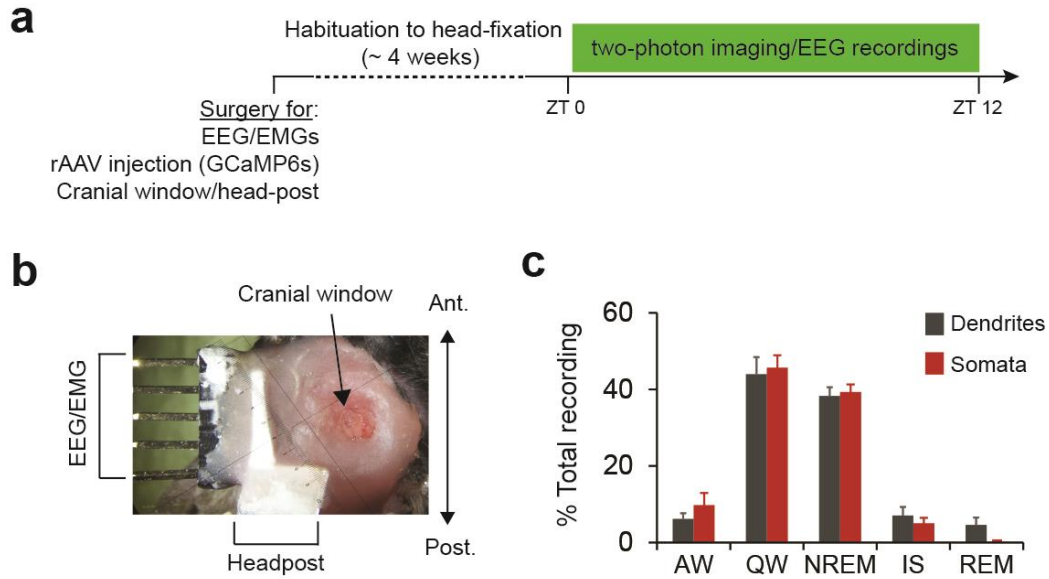

**Supplementary Fig. 9 Experimental design and behavioural states for two-photon experiments**

(a) Experimental design. (b) Head implant for combined two-photon  $\text{Ca}^{2+}$  imaging and EEG/EMG recordings. (c) Average (mean  $\pm$  s.e.m.) time spent in each behavioral state did not differ between dendritic and somatic recordings (two-way ANOVA; factor “group”:  $F_{1,20} = 2\text{E-}05$ ,  $P = 0.99$ ;  $n = 3/\text{group}$ ).

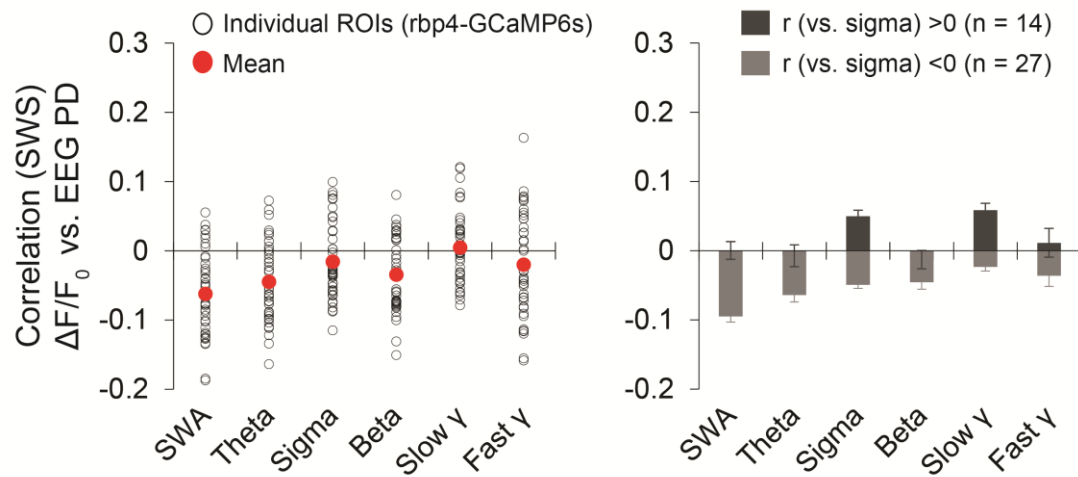

**Supplementary Fig. 10 Correlation between  $\text{Ca}^{2+}$  activity in individual soma of L5 pyramidal cell and EEG during SWS** The Rbp4-cre mouse line was used to express GCaMP6s (floxed-AAV) specifically in L5 pyramidal neurons. (*Left panel*) Correlation between  $\Delta F/F_0$  for all single somata ( $n = 41$  cells in 1 mouse) and EEG-FP PDs for different frequency bands during SWS (SO and delta bands were combined into slow wave activity [SWA: 0.5-4Hz] due to similar trends). Values from individual 4-s SWS epochs were used for correlation. (*Right panel*) Mean ( $\pm$  s.e.m.) correlation across somata selected to have a positive ( $r > 0$ ) or negative ( $r < 0$ ) correlation with sigma PD.

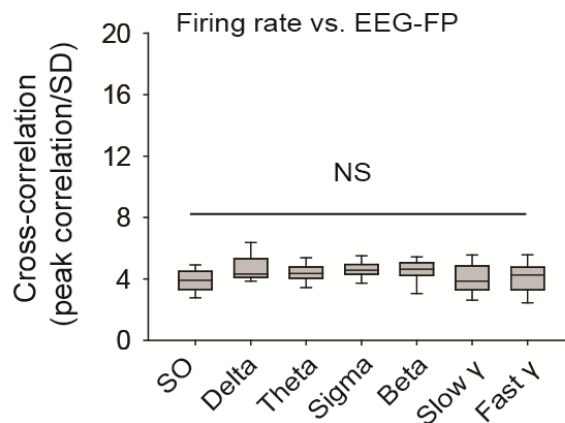

**Supplementary Fig. 11 Cross-correlation between L5 cell bodies firing rate and parietal EEG frequency bands** Similar cross-correlation analysis as for the frontal EEG (Fig. 7e). Post-hoc comparisons following the two-way ANOVA revealed no significant difference between frequency bands for parietal EEG but a significant lower correlation of firing rate with delta oscillations compared to frontal EEG (Delta: EEG-FF vs. EEG-FP,  $P < 0.05$ , Holm-Sidak test). Values represents means  $\pm$  s.e.m.

**SUPPLEMENTARY TABLE**

| <b>Injected layer</b> | <b>Illumination</b> | <b>Dye</b> | <b>N</b>  | <b>Age</b>          | <b>Analyzed time (min.)</b> |
|-----------------------|---------------------|------------|-----------|---------------------|-----------------------------|
| <b>L5</b>             | Surface             | OGB        | 4         | 38.5 ± 0.98         | 127.3 ± 30.43               |
|                       | Surface             | GC         | 3         | 46.3 ± 3.48         | 144.38 ± 21.9               |
|                       | Prism               | OGB        | 1         | 32                  | 162.33                      |
|                       | Prism               | GC         | 3         | 43 ± 2.52           | 156.07 ± 21.78              |
| <b>L2/3</b>           | Surface             | OGB        | 5         | 37 ± 0.71           | 142.99 ± 13.38              |
|                       | Surface             | GC         | 6         | 42.67 ± 1.31        | 130.39 ± 14.42              |
| <b>Ctrl</b>           | Surface             | none       | 3         | 35.67 ± 0.67        | 184.29 ± 12.94              |
|                       | Surface             | Flx.GC     | 3         | 47 ± 1.53           | 158.6 ± 23.64               |
| <b>Combined</b>       |                     |            |           |                     |                             |
| <b>L5</b>             |                     |            | <b>11</b> | <b>41.27 ± 1.72</b> | <b>142.99 ± 13.04</b>       |
| <b>L23</b>            |                     |            | <b>11</b> | <b>39.67 ± 1.26</b> | <b>131.15 ± 10.06</b>       |
| <b>Ctrl</b>           |                     |            | <b>6</b>  | <b>41.33 ± 2.64</b> | <b>171.44 ± 13.35</b>       |

**Supplementary Table 1 Groups for freely behaving experiments** The table presents number (N) and mean age of rats in each group and the duration of the recorded session used for analysis (*Analyzed time*). We also represent the distribution in each group of animals that were recorded using similar imaging conditions (illumination [Surface vs. 90° angled “Prism”] and Ca<sup>2+</sup> dye [OGB1-AM (OGB), GCaMP6s (GC) and Flex-GCaMP6s [Flx.GC]). There was no difference in age ( $F_{2,25} = 0.18$ ,  $P = 0.84$  one-way ANOVA) or analyzed time ( $F_{2,25} = 1.84$ ,  $P = 0.18$  one-way ANOVA) between groups. All values represents means ± s.e.m.
